1 Synthetic genome defenses against selfish DNA elements  
2 stabilize engineered bacteria against evolutionary failure

3

4 Peng Geng, Sean P. Leonard, Dennis M. Mishler, Jeffrey E. Barrick\*

5

6 <sup>1</sup>Department of Molecular Biosciences, Center for Systems and Synthetic Biology, The  
7 University of Texas at Austin, Austin, TX 78712, USA

8

9 **Corresponding Author**

10 Jeffrey E. Barrick

11 2500 Speedway A5000

12 The University of Texas at Austin

13 Austin, TX 78712

14 Phone: +1 (512) 471-3247

15 Email: [jbarrick@cm.utexas.edu](mailto:jbarrick@cm.utexas.edu)

16

17

18

19 **Abstract**

20 Mobile genetic elements drive evolution by disrupting genes and rearranging genomes. Eukaryotes  
21 have evolved epigenetic mechanisms, including DNA methylation and RNA interference, that  
22 silence mobile elements and thereby preserve the integrity of their genomes. We created an  
23 artificial reprogrammable epigenetic system based on CRISPR interference to give engineered  
24 bacteria a similar line of defense against transposons and other selfish elements in their genomes.  
25 We demonstrate that this CRISPR interference against mobile elements (CRISPRi-ME) approach  
26 can be used to simultaneously repress two different transposon families in *Escherichia coli*,  
27 thereby increasing the evolutionary stability of costly protein expression. We further show that  
28 silencing a transposon in *Acinetobacter baylyi* ADP1 reduces mutation rates by a factor of five,  
29 nearly as much as deleting all copies of this element from its genome. By deploying CRISPRi-ME  
30 on a broad-host-range vector we have created a generalizable platform for stabilizing the genomes  
31 of engineered bacterial cells for applications in metabolic engineering and synthetic biology.

32

33 **Keywords:** genome stability, insertion sequence, selfish DNA, reduced mutation cell

34

35

## 36 **Significance**

37 Engineered cells often cease to function or lose productivity when mutations arise in their genomes.  
38 Mobile DNA elements, such as transposons, are major sources of these inactivating mutations.  
39 Eukaryotic genomes have evolved flexible epigenetic defenses against mobile DNA that help them  
40 to maintain genome integrity, but bacteria do not possess comparable silencing systems. We  
41 developed a synthetic control system based on CRISPR interference that can be used to give  
42 bacterial cells a reprogrammable line of defense against selfish DNA elements in their genomes.  
43 We show that this system effectively represses multicopy transposons and multiple families of  
44 transposons. Limiting selfish DNA proliferation within a genome in this way improves the  
45 reliability of genetically engineered functions in replicating bacterial cell populations.

## 46 **Introduction**

47 Unwanted evolution is a foundational challenge for the many areas of biotechnology that rely on  
48 genetically engineered organisms (1–3). Engineered cells are often less fit than their wild-type  
49 progenitors because they divert resources away from cellular replication or otherwise perturb  
50 normal physiological processes (4). Mutations will spontaneously arise in the genomes of some  
51 cells in a population that disrupt a DNA-encoded function. Cells with these ‘failure mutations’  
52 often have a significant competitive growth advantage because the engineered burden has been  
53 lifted. They will out-replicate the original engineered cells, resulting in a progressive reduction in  
54 the performance of the cell population over time (5–8). When the aim is to maximize the  
55 production of a recombinant protein or a chemical product, these evolutionary failure modes will  
56 reduce yields and limit the useful lifetimes of engineered cells. Genetic instability due to evolution  
57 is particularly a problem if there is a large fitness burden for the engineered function during the  
58 many cell divisions needed during scale-up of a process to an industrial bioreactor (9).

59 Simple transposons known as insertion sequence (IS) elements are the dominant source of  
60 failure mutations in many engineered bacterial cells (5–8). IS elements are minimal selfish DNA  
61 elements: they may consist of just a single transposase gene flanked by inverted repeats (10). They  
62 can cause mutations directly, when new IS copies insert into a target DNA site by cut-and-paste  
63 or copy-and-paste mechanisms, and indirectly, when recombination between multiple copies of  
64 the same IS element leads to deletions or genome rearrangements. Nicking or cleavage of the  
65 chromosome by transposases may also induce mutagenic DNA damage responses (11), and  
66 transposase binding to the  $\beta$  sliding clamp of the DNA polymerase holoenzyme (12) also has the  
67 potential to decrease the fidelity of DNA replication. IS elements can rapidly proliferate within  
68 genomes, and they can invade new cells when they are incorporated into DNA elements that

69 mediate horizontal gene transfer, such as conjugative plasmids. Thus, many bacterial genomes  
70 harbor multiple copies of several different IS families (13, 14).

71 If one could silence gene expression from all IS elements that are present in a bacterial host, it  
72 would be expected to significantly improve the stability of an engineered function in that cell.  
73 Yeast and other eukaryotes have evolved a wide array of epigenetic mechanisms—including DNA  
74 methylation, chromatin remodeling, and RNAi—that protect the integrity of their genomes (15).  
75 These pathways operate in a flexible manner that enables them to simultaneously silence diverse  
76 families of established selfish elements and adapt to newly arrived elements. Many bacteria have  
77 defenses, such as RNA-guided nucleases (e.g., CRISPR-Cas9) and restriction-modification  
78 systems, that protect their genomes from invasions of new phages, plasmids, and mobile genetic  
79 elements (16). However, bacteria do not have a general capacity to silence selfish elements after  
80 they have become entrenched in their genomes that is akin to what takes place in eukaryotes.

81 Perhaps due to this limitation, many IS elements in bacteria have evolved regulatory  
82 mechanisms that repress their own activity (17, 18). Presumably, this self-limiting strategy evolved  
83 to prevent an IS element from endangering its own survival by overly proliferating within the host  
84 genome and causing deleterious mutations in an entire cell population. For example, an antisense  
85 RNA is transcribed from the *IS10* transposase reading frame that binds to and inhibits translation  
86 of a transposase mRNA produced by the same or any other copy of *IS10* in the genome. Host  
87 factors also impact transposition (17, 18). For instance, *dam* methylation inhibits *IS10*  
88 transposition, and the nucleoid-like protein IHF facilitates *IS10* transposition. These interactions  
89 often modulate transposition so that it is restricted to certain times during DNA replication or to  
90 when cells experience stress. These regulatory interactions may represent ‘domestication’ of an IS  
91 element such that there is indirect selection to maintain its activity in a bacterial genome because

92 it increases the rates of certain types of beneficial mutations (19, 20), including those that disrupt  
93 burdensome plasmids and transgenes added to the genome by human engineering.

94 Here we describe a reprogrammable plasmid system that prevents evolutionary failures caused  
95 by transposons and other mobile elements in genetically engineered bacterial genomes. Our system  
96 takes advantage of recently developed CRISPR interference methods (21) and a broad-host-range  
97 plasmid backbone (22) that both function in a wide range of bacterial species. Because CRISPR  
98 interference can be programmed to bind to and repress specific DNA sequences, one can silence  
99 all copies of an active transposon or other selfish element family in a bacterial host genome by  
100 adding a single guide RNA to the plasmid. We show that our system for targeting CRISPR  
101 interference against mobile elements (CRISPRi-ME) effectively silences multicopy IS elements  
102 and multiple families of IS elements. CRISPRi-ME increased the lifetime of burdensome protein  
103 expression in *Escherichia coli* and reduced mutation rates in *Acinetobacter baylyi* ADP1. The  
104 CRISPRi-ME system can be used to give diverse bacterial species a new system of epigenetic  
105 protection against pervasive genomic parasites that cause mutations, thereby improving the  
106 reliability of genetically engineered versions of these cells.

107

## 108 **Results**

### 109 **CRISPR interference from a broad-host range vector**

110 The CRISPRi-ME system uses one or more small guide RNAs (sgRNAs) to target a catalytically  
111 dead Cas9 nuclease (dCas9) to bind to specific DNA sequences that silence mobile elements (**Fig.**  
112 **1**). To implement CRISPRi-ME we started with a well-characterized CRISPR interference  
113 (CRISPRi) system that we had previously ported onto a broad-host-range plasmid vector (22). The  
114 basic CRISPRi design is derived from plasmids pTargetF and pCas, which were designed for

115 efficient multiplex genome editing in Enterobacteria (23). We substituted a dCas9 gene with the  
116 canonical deactivating mutations into this system (21, 24). Then, we added these components to a  
117 plasmid backbone derived from the broad-host range expression vector pMMB67EH (25). It  
118 contains a low- to medium-copy-number (10-20 plasmids per cell) RSF1010-derived origin of  
119 replication that has been shown to function robustly in diverse bacterial species (26), including *E.*  
120 *coli* (27), *Pseudomonas aeruginosa* (28), *Acinetobacter baumannii* (29), and *Snodgrassella alvi*  
121 (22). The pMMB67EH backbone also contains an origin of transfer (*oriT*) that enables this plasmid  
122 to be conjugated into diverse bacteria.

123 To create a customized CRISPRi-ME system (**Fig. 2**), one starts with a plasmid with a single  
124 sgRNA targeting unit, a plasmid with the dCas9 transcriptional unit, and a plasmid with the  
125 pMMB67EH backbone. Different promoters may be needed to drive transcription of the sgRNA  
126 and dCas9 genes to achieve optimal function in different bacterial species, as described in the  
127 following sections. Assembly of a CRISPRi-ME plasmid proceeds by first creating one or more  
128 variants of the sgRNA plasmid for each targeted mobile element (e.g., IS element transposase)  
129 (**Step 1**) and joining them together into a multiple sgRNA targeting cassette plasmid when multiple  
130 mobile element families are to be targeted from one CRISPRi-ME plasmid (**Step 2**). Then, all  
131 sgRNAs, the dCas9 transcriptional unit, and the pMMB67EH backbone are combined in a final  
132 assembly step (**Step 3**). The final CRISPRi-ME plasmid can be purified and transformed into the  
133 bacterium of interest or directly transferred into a recipient cell from an *E. coli* strain that encodes  
134 the required conjugation machinery (e.g., MFDpir) (30).

135

### 136 **CRISPRi-ME stabilizes burdensome protein expression in *E. coli***

137 We first tested how effective our CRISPRi system was at silencing gene expression in *E. coli*. We

138 used previously validated promoters to drive expression of each CRISPRi component (21–23, 31):  
139 the native *Streptococcus pyogenes* Cas9 promoter for dCas9 and the constitutive synthetic  
140 promoter pJ23119 for each sgRNA (**Fig. 3A**). To test the function of this CRISPRi system on the  
141 pMMB67EH plasmid backbone, superfolder GFP (sfGFP) under the control of the native *glpT*  
142 promoter was integrated into the genome of a reporter strain of *E. coli*. This CRISPRi configuration  
143 strongly repressed expression of sfGFP when an sgRNA targeting this gene was used (>90%)  
144 whereas there was no repression with an off-target sgRNA (**Fig. 3B**).

145 To determine if CRISPRi-ME could prevent a mobile element from causing inactivating  
146 mutations in an engineered DNA sequence, we added this synthetic genetic control system to an  
147 *E. coli* TOP10 strain containing plasmid pSB1C3-sYFP2 (**Fig. 3C**). This is a high copy number  
148 plasmid constructed from BioBrick parts (32) that strongly expresses a super yellow fluorescent  
149 protein variant (sYFP2) (33). In preliminary experiments with this strain, we found that mutant  
150 cells with *IS10* element insertions that inactivated sYFP2 expression rapidly arose and  
151 outcompeted fluorescent cells. *IS10* is found in two copies that flank the *Tn10* composite  
152 transposon in the genome of the host *E. coli* strain (34), and it is known to have strong specificity  
153 for certain target site sequences (35). In agreement with this expectation, every independently  
154 derived non-fluorescent mutant had an *IS10* insertion at precisely the same site early in the sYFP2  
155 reading frame. We found that editing this target sequence could prevent *IS10* from inserting at this  
156 site. When using this edited plasmid, mutations that eliminated the burden of sfYFP expression  
157 still arose, but now they were either point mutations or insertions of an *IS5* element. *IS5* is found  
158 in 14 copies in the TOP10 genome. It preferentially inserts at sites matching the four-base sequence  
159 YTAR (36), which occur many times throughout the engineered DNA sequence, and inactivating  
160 *IS5* element insertions were found to occur at various different positions in the construct.



161 From these preliminary results, we expected that adding a sgRNA targeting the transposase of  
162 *IS10* would eliminate the dominant failure mode of pSB1C3-sYFP2 and that adding another  
163 sgRNA targeting *IS5* might further stabilize the function of this engineered plasmid. We compared  
164 the evolutionary stability of fluorescence in *E. coli* TOP10 cells containing the pSB1C3-sYFP2  
165 plasmid and either a CRISPRi-ME off-target plasmid control, a CRISPRi-ME anti-*IS10* plasmid,  
166 or a CRISPRi-ME anti-*IS10*+anti-*IS5* plasmid (**Fig. 3D**). The growth process for each replicate  
167 cell population started from culturing an entire single colony that was brightly fluorescent. All  
168 cells from the colony were transferred and grown in liquid cultures overnight to saturation (~35  
169 cell doublings). Then each population was diluted 1:1000 into fresh medium and allowed to regrow  
170 for 24 hours (~10 additional cell doublings per day). Most of the original fluorescence was lost in  
171 populations of the CRISPRi-ME off-target strain by the fourth day (~65 cell doublings), and the  
172 fluorescence was totally lost after the sixth day (~85 cell doublings). In the CRISPRi transposon  
173 repressed strains, the fluorescence expression was more stable. Especially in the *IS10*+*IS5* dual  
174 repression strain, the host cells were still expressing at least half level the original fluorescence  
175 after the fourth day (~65 cell doublings).

176 We isolated plasmids from non-fluorescence cells at the end of experiments and sequenced  
177 them to determine what types of mutations were responsible for inactivating sYFP2 expression in  
178 each case (**Fig. 3E**). In the wild-type *E. coli* strain, sYFP2 was inactivated in 10/10 cases by *IS10*  
179 insertions. In contrast, no *IS10* insertions were found in any of the strains with CRISPRi-ME  
180 systems containing an anti-*IS10* sgRNA. An *IS5* insertion was found in 1/10 nonfluorescent  
181 plasmids from the CRISPRi-ME strain with only the anti-*IS10* sgRNA. In the dual anti-*IS10* and  
182 anti-*IS5* sgRNA strain, no IS element insertions in the sYFP2 gene were found. Therefore, by  
183 silencing multiple copies of the same IS family and multiple IS families, the CRISPRi-ME system

184 essentially eliminated evolutionary failures due to selfish DNA elements for this construct.

185

### 186 **CRISPRi-ME reduces mutation rates in *A. baylyi* ADP1**

187 The RSF1010 plasmid origin and dCas9 repression system should enable the CRISPRi-ME system  
188 to repress mobile elements in a wide variety of bacterial species. To demonstrate its effectiveness  
189 in another context we adapted CRISPRi-ME for use in *Acinetobacter baylyi* ADP1. This  $\gamma$ -  
190 proteobacterium is of interest in biotechnology due to its natural transformability and metabolic  
191 versatility (37–39). *Acinetobacter* species are more closely related to pseudomonads than they are  
192 to enterobacteria (40), and typical *E. coli* plasmids with ColE1-type origins do not replicate  
193 reliably in *A. baylyi* (41, 42). The plasmid pMMB67EH, which is the source of the RSF1010  
194 replicon employed in CRISPRi-ME, has been shown to replicate in the related species  
195 *Acinetobacter baumannii* (43). Many *Acinetobacter* species have native type I CRISPR systems in  
196 their genomes (44), but neither genome editing nor control of gene expression with Cas9-based  
197 systems has been demonstrated previously in this genus to our knowledge.

198 We found that the RSF1010 backbone used in CRISPRi-ME reliably replicated in *A. baylyi*  
199 ADP1. However, it was necessary to change the promoters driving expression of dCas9 and  
200 sgRNAs in order for CRISPRi to function effectively from this platform in ADP1 (**Fig. 4A**). For  
201 dCas9 we used a promoter that has been used to drive the *tdk* gene, which is used as a counter-  
202 selectable marker in this organism (45). For the sgRNA, we used the T5 promoter, which has  
203 previously been shown to yield robust constitutive expression in ADP1 (46). With these  
204 modifications, there was near-complete repression of an sfGFP gene integrated into the  
205 chromosome when the CRISPRi-ME plasmid was used with an on-target sgRNA (**Fig. 4B**).

206 *A. baylyi* ADP1 has six copies of one type of transposable element, IS1236, and this element

207 is a dominant source of genetic instability in this strain (47–49). Therefore, we designed a  
208 CRISPRi-ME plasmid that represses the *IS1236* transposase (**Fig. 4C**). To determine if silencing  
209 *IS1236* stabilized the ADP1 genome against evolution, we used Luria-Delbrück fluctuation assays  
210 to measure mutation rates. Loss-of-function mutations in a copy of the *tdk* counterselectable  
211 marker inserted into the bacterial chromosome confer resistance to the chain-terminating base  
212 analogue, azidothymidine (AZT) (39). Therefore, the mutation rate to AZT resistance yields an  
213 aggregate estimate of the risk that an engineered DNA construct inserted into the ADP1 genome  
214 has of becoming inactivated by *IS1236* activity or by other mutations.

215 We measured mutation rates to AZT resistance in two ADP1 host strains that had the *tdk*  
216 mutational reporter gene integrated at different locations in the bacterial chromosome (**Fig. 4D**).  
217 We found that the presence of the anti-*IS1236* CRISPRi-ME system reduced the rates of  
218 inactivating mutations in the *tdk* gene by a factor of five at both sites whereas strains with the off-  
219 target sgRNA exhibited no change in mutation rates. The five-fold reduction in mutation rates  
220 indicates that there is near-complete suppression of *IS1236* activity, as mutation rates in strains  
221 with the CRISPRi-ME system were almost as reduced as they were in a positive-control ‘clean-  
222 genome’ ADP1-ISx strain in which all six *IS1236* elements were deleted from the genome (49).

223

## 224 **Discussion**

225 In this study, we developed and employed CRISPR interference against mobile elements in bacteria.  
226 This CRISPRi-ME approach reduced the detrimental effects of IS elements on the continued  
227 production of target biomolecules and significantly stabilized genetically engineered DNA  
228 sequences. Specifically, we prevented inactivating mutations that result in the loss of burdensome  
229 protein expression from a plasmid in the *E. coli*, and we reduced mutation rates in the bacterial

230 chromosome by as much as 5-fold in *A. baylyi*. Because CRISPRi-ME employs broad-host-range  
231 components (the RSF1010 replicon and the dCas9 catalytically inactivated RNA-guided nuclease),  
232 it can be readily reprogrammed to function in diverse bacterial species.

233 To completely prevent loss-of-function mutations generated by insertion sequences, ‘clean-  
234 genome’ bacterial strains have been constructed in which one or more IS element families and  
235 sometimes other selfish elements, like prophage, have been deleted from the chromosome.  
236 Examples of clean-genome strains include *Escherichia coli* MDS42 (5), *Pseudomonas putida*  
237 EM383 (50), *Corynebacterium glutamicum* WJ004 and WJ008 (51), and *Acinetobacter baylyi*  
238 ADP1-ISx (49). Engineering projects that begin in these strain backgrounds do not have to worry  
239 about IS element activity. However, many strains of bacteria used in research and industrial  
240 applications already exist that have been subjected to extensive genome editing efforts or directed  
241 evolution during which many beneficial mutations have accumulated in their genomes (52–55).  
242 Preventing IS elements from compromising the functions of these highly engineered strains is  
243 nontrivial. One must either identify the mutations that are important for the strain’s function and  
244 re-engineer them into a clean-genome strain background or repeat the process of sequentially  
245 deleting selfish elements from the engineered strain’s genome, which is labor-intensive (5, 49).

246 In eukaryotic cells that have efficient nonhomologous end joining (NHEJ), it is possible to  
247 simultaneously inactivate many members of a single selfish DNA element that contributes to  
248 genome instability by targeting them for cleavage with an RNA-guided nuclease (56). NHEJ  
249 processes do not exist or are inefficient in most bacteria (57), including *E. coli* (58), but it may be  
250 possible in the future to heterologously express a NHEJ system to achieve multiplex editing that  
251 could be used to inactivate selfish DNA elements in bacterial genomes (59). Alternatively, the  
252 process of re-cleaning a new bacterial genome can be accelerated by using a related clean-genome

253 strain as a donor for transduction and existing multiplex genome editing methods (60).

254 The CRISPRi-ME approach is to silence the expression of mobile elements, rather than to  
255 delete them from the bacterial chromosome. It resembles how eukaryotic genomes have evolved  
256 defenses to maintain genome integrity against abundant selfish DNA elements in their genomes.  
257 In the context of bacterial genetic engineering, the CRISPRi-ME system can be used to rapidly  
258 prototype whether silencing a particular mobile element family will increase the stability of an  
259 engineered function before investing in the time-consuming process of deleting all of its copies  
260 from a genome. We did not observe a growth rate cost for adding this exogenous silencing control  
261 system to cells, so it could also be directly useful for stabilizing certain bioproduction processes.  
262 Recently Tn7 and ICE element based tools for integrating CRISPRi systems into bacterial genomes  
263 have become available (61). CRISPR-iME could be implemented using these systems when  
264 maintaining a genetic control plasmid is not desirable and for adding compatibility with even more  
265 bacterial species. CRISPRi-ME gives bacteria a synthetic line of defense against endogenous  
266 mobile DNA elements, thereby stabilizing the function of genetically engineered cells.

267

## 268 **Materials and Methods**

### 269 **Bacterial strains and growth conditions**

270 *E. coli* strains were cultured at 37°C in Lysogeny Broth (LB) (10 g NaCl, 10 g tryptone, and 5 g  
271 yeast extract per liter). We used *E. coli* DH5 $\alpha$  for all cloning steps. *A. baylyi* was cultured in LB  
272 at 30°C. Both bacteria were incubated with orbital shaking at 200 r.p.m. over a 1-inch diameter.  
273 Media amendments were added at the following concentrations when specified: kanamycin (Kan),  
274 50  $\mu$ g/ml; spectinomycin (Spec), 60  $\mu$ g/ml; carbenicillin (Crb), 100  $\mu$ g/ml; chloramphenicol (Cam),  
275 20  $\mu$ g/mL; 3'-azido-2',3'-dideoxythymidine (AZT), 200  $\mu$ g/ml.

## 276 **Broad-host-range CRISPRi platform**

277 Lee et al. constructed a versatile yeast toolkit (YTK) for Golden Gate assembly of plasmids (62),  
278 and we extended it to enable genetic engineering of bacteria from the bee gut microbiome (BTK)  
279 (22). These kits designate particular restriction enzyme overhangs for promoters, coding sequences,  
280 terminators, and connectors that allow plasmids to be hierarchically assembled using Golden Gate  
281 assembly. We followed the basic design principles used in the BTK for CRISPRi-ME plasmid  
282 construction as illustrated in **Fig. 2**. The five component plasmids needed to assemble the  
283 CRISPRi-ME systems validated in *E. coli* and *A. baylyi* in this study have been submitted to the  
284 Addgene plasmid repository. Their sequences are provided in **Dataset S1**.

285 The first two component plasmids for the single sgRNA targeting unit and dCas9  
286 transcriptional unit plasmids were created by cloning these genes into pYTK095, which has a  
287 ColE1 origin (62). The sgRNA targeting unit plasmid contains connectors ConLS and ConR1  
288 flanking a sgRNA transcriptional unit. Megaprimer PCR of Whole Plasmids (MEGAWHOP)  
289 cloning (63) was used to change the 20-base sgRNA target region in this plasmid to the sequences  
290 given in **Table S1** for different experiments. Each *E. coli* sgRNA was checked for potential off-  
291 target binding sites in the bacterial genome using the Cas-Designer web tool (64). For the multiple  
292 target CRISPRi system, the sgRNA transcriptional units from two such plasmids were assembled  
293 into the pYTK095 plasmid backbone using Gibson assembly with an arbitrary DNA linker added  
294 between them to maintain terminal ConLS and ConR1 linkers. The dCas9 transcriptional unit is  
295 flanked by ConL1 and ConRE connectors in its plasmid. The coding sequence for dCas9 was  
296 derived from plasmid pdCas9 (24) with the removal of an internal BsmBI site. The sgRNA and  
297 dCas9 transcriptional units were assembled together with the RSF1010 origin from pMMB67EH  
298 using BsmBI Golden Gate assembly.

## 299 **GFP repression assays**

300 An *E. coli* MG1655 derivative constitutively expressing sfGFP from the chromosome was created  
301 using  $\lambda$  Red recombination (65). Briefly, we generated a DNA fragment with the native *E. coli*  
302 *glpT* promoter controlling sfGFP linked to an adjacent chloramphenicol resistance gene via PCR  
303 reactions that also added 50-bp extensions homologous to regions adjacent to the *lacZ* gene. This  
304 product was electroporated into cells induced to express the  $\lambda$  Red proteins from plasmid pKD46  
305 as previously described (66). A fluorescent colony was selected on LB-Cam agar and then cured  
306 of the temperature-sensitive pKD46 plasmid to isolate strain MG1655-sfGFP.

307 For *A. baylyi* we used natural transformation to add a similar cassette to the chromosome at a  
308 neutral location (Site 2) as previously described (49). Briefly, a double-stranded DNA fragment  
309 which contained sfGFP under control of the Tac promoter, a chloramphenicol resistance gene, and  
310 two 1-kb chromosomal flanking homology regions was constructed by PCR. Then, *A. baylyi* ADP1  
311 was transformed with this DNA fragment as previously described (67). A fluorescent colony was  
312 selected after plating these cells on LB-Cam agar and designated strain ADP1-sfGFP.

313 CRISPRi-ME plasmids were transformed into MG1655-sfGFP and ADP1-sfGFP to test the  
314 effectiveness of gene silencing. Entire colonies were scraped from agar plates and inoculated into  
315 10 mL of LB. After incubation for 12 hours, the absorbance at 600 nm (OD600) and fluorescence  
316 (excitation 488 nm, emission 525 nm) were measured for 100  $\mu$ l samples taken from these cultures  
317 using a Tecan Infinite M200 PRO microplate reader. The off-target sgRNA used in these tests was  
318 targeted to a different fluorescent protein variant, GFP optim-1 (22).

## 319 **Monitoring plasmid failure**

320 The *E. coli* mutational reporter plasmid was constructed by BioBrick assembly of promoter  
321 (J23100), ribosome binding site (B0034), and sYFP2 fluorescent protein (K864100) parts obtained

322 from the iGEM Registry of Standard Biological Parts (32). There were two six-base-pair repeats  
323 (TACTAG) located upstream and downstream of the ribosome binding site in this initial plasmid  
324 that mediated a deletion that dominated among the mutations leading to non-fluorescent cells after  
325 *IS10* silencing in preliminary experiments. To eliminate this mutational hotspot, the upstream  
326 repeat copy was modified to GTATAG to create the reporter plasmid used in our experiment.

327 For each strain tested in the decay experiment, ten different strongly fluorescent colonies on a  
328 LB agar plate were each transferred into test tubes containing 5 ml of LB. After 24 hours of growth  
329 (designated day 1 of serial transfer), 5  $\mu$ l of culture was transferred from each test tube into 5 ml  
330 of fresh LB in a new test tube. This procedure was repeated for eight additional days. Fluorescence  
331 (excitation 495 nm, emission 530 nm) and OD600 were monitored as described above. The off-  
332 target sgRNA control in this experiment was targeted to the *A. baylyi* ADP1 *IS1236* sequence.

### 333 **Mutation rate measurements**

334 For each strain, an initial overnight culture was grown in LB-Spec for strains carrying a CRISPRi-  
335 ME plasmid or LB for other strains. Then, fourteen independent 100  $\mu$ l cultures per strain in 18  $\times$   
336 150 mm test tubes in the same media were each inoculated with  $\sim$ 500 cells from the overnight  
337 culture. These new replicate cultures for the fluctuation test were then allowed to grow overnight  
338 ( $\sim$ 16 h) to saturation. To estimate the total number of cell numbers in the final cultures, dilutions  
339 in sterile saline from two of the tubes were plated on nonselective LB agar plates. The entire  
340 volumes of the other twelve tubes were plated separately on selective LB-AZT agar plates. All  
341 plates were incubated at 30°C for 24 h, then colony numbers were counted. Mutation rates were  
342 estimated from these counts using rSalvador (version 1.7) (68). The off-target sgRNA used in this  
343 experiment targeted the GFP *optim-1* sequence, as above.

344



## 345 **Acknowledgments**

346 We thank Kelsey Hu and the UT Austin “Microbe Hackers” Freshman Research Initiative stream  
347 for their work identifying the evolutionary failure modes of the sYFP2 plasmid and Gabriel  
348 Suárez for advice and materials for working with *A. baylyi* ADP1.

349

## 350 **Funding Information**

351 This work was funded by the Defense Advanced Research Projects Administration (HR0011-15-  
352 C0095) and the National Science Foundation (CBET-1554179).

353

## 354 **References**

- 355 1. Arkin AP, Fletcher DA (2006) Fast, cheap and somewhat in control. *Genome Biol* 7:114.
- 356 2. Canton B, Labno A, Endy D (2008) Refinement and standardization of synthetic  
357 biological parts and devices. *Nat Biotechnol* 26:787–793.
- 358 3. Renda BA, Hammerling MJ, Barrick JE (2014) Engineering reduced evolutionary  
359 potential for synthetic biology. *Mol Biosyst* 10:1668–1678.
- 360 4. Borkowski O, Ceroni F, Stan G-B, Ellis T (2016) Overloaded and stressed: whole-cell  
361 considerations for bacterial synthetic biology. *Curr Opin Microbiol* 33:123–130.
- 362 5. Umenhoffer K et al. (2010) Reduced evolvability of *Escherichia coli* MDS42, an IS-less  
363 cellular chassis for molecular and synthetic biology applications. *Microb Cell Fact* 9:38.
- 364 6. Sleight SC, Bartley BA, Lieviant JA, Sauro HM (2010) Designing and engineering  
365 evolutionary robust genetic circuits. *J Biol Eng* 4:12.
- 366 7. Sleight SC, Sauro HM (2013) Visualization of evolutionary stability dynamics and  
367 competitive fitness of *Escherichia coli* engineered with randomized multigene circuits.

- 368 *ACS Synth Biol* 2:519–528.
- 369 8. Rugbjerg P, Myling-Petersen N, Porse A, Sarup-Lytzen K, Sommer MOA (2018) Diverse  
370 genetic error modes constrain large-scale bio-based production. *Nat Commun* 9:787.
- 371 9. Sandoval CM et al. (2014) Use of pantothenate as a metabolic switch increases the  
372 genetic stability of farnesene producing *Saccharomyces cerevisiae*. *Metab Eng* 25:1–12.
- 373 10. Vandecraen J, Chandler M, Aertsen A, Van Houdt R (2017) The impact of insertion  
374 sequences on bacterial genome plasticity and adaptability. *Crit Rev Microbiol* 43:709–  
375 730.
- 376 11. Lane D, Cavallé J, Chandler M (1994) Induction of the SOS response by *IS1*  
377 transposase. *J Mol Biol* 242:339–350.
- 378 12. Díaz-Maldonado H et al. (2015) Transposase interaction with the  $\beta$  sliding clamp: Effects  
379 on insertion sequence proliferation and transposition rate. *Sci Rep* 5:1–13.
- 380 13. Siguier P, Gourbeyre E, Chandler M (2014) Bacterial insertion sequences: Their genomic  
381 impact and diversity. *FEMS Microbiol Rev* 38:865–891.
- 382 14. Touchon M, Rocha EPC (2007) Causes of insertion sequences abundance in prokaryotic  
383 genomes. *Mol Biol Evol* 24:969–981.
- 384 15. Slotkin RK, Martienssen R (2007) Transposable elements and the epigenetic regulation of  
385 the genome. *Nat Rev Genet* 8:272–285.
- 386 16. Koonin E V., Makarova KS, Wolf YI (2017) Evolutionary genomics of defense systems  
387 in archaea and bacteria. *Annu Rev Microbiol* 71:233–261.
- 388 17. Nagy Z, Chandler M (2004) Regulation of transposition in bacteria. *Res Microbiol*  
389 155:387–398.
- 390 18. Kleckner N (1990) Regulation of transposition in bacteria. *Annu Rev Cell Biol* 6:297–

- 391 327.
- 392 19. Chao L, Vargas C, Spear BB, Cox EC (1983) Transposable elements as mutator genes in  
393 evolution. *Nature* 303:633–635.
- 394 20. Fehér T et al. (2012) Competition between transposable elements and mutator genes in  
395 bacteria. *Mol Biol Evol* 29:3153–9.
- 396 21. Qi LS et al. (2013) Repurposing CRISPR as an RNA-guided platform for sequence-  
397 specific control of gene expression. *Cell* 152:1173–83.
- 398 22. Leonard SP et al. (2018) Genetic engineering of bee gut microbiome bacteria with a  
399 toolkit for modular assembly of broad-host-range plasmids. *ACS Synth Biol* 7:1279–1290.
- 400 23. Jiang Y et al. (2015) Multigene editing in the *Escherichia coli* genome via the CRISPR-  
401 Cas9 system. *Appl Environ Microbiol* 81:2506–2514.
- 402 24. Bikard D et al. (2013) Programmable repression and activation of bacterial gene  
403 expression using an engineered CRISPR-Cas system. *Nucleic Acids Res* 41:7429–7437.
- 404 25. Scholz P et al. (1989) Complete nucleotide sequence and gene organization of the broad-  
405 host-range plasmid RSF1010. *Gene* 75:271–288.
- 406 26. Fürste JP et al. (1986) Molecular cloning of the plasmid RP4 primase region in a multi-  
407 host-range *tacP* expression vector. *Gene* 48:119–31.
- 408 27. Lee MD, Henk AD (1997) RSF1010-based shuttle vectors for cloning and expression in  
409 *Pasteurella multocida*. *Vet Microbiol* 54:369–374.
- 410 28. Uwate M et al. (2013) Two routes of MexS-MexT-mediated regulation of MexEF-OprN  
411 and MexAB-OprM efflux pump expression in *Pseudomonas aeruginosa*. *Microbiol*  
412 *Immunol* 57:263–272.
- 413 29. Tucker AT et al. (2018) Discovery of next-generation antimicrobials through bacterial

- 414 self-screening of surface-displayed peptide libraries. *Cell* 172:618–628.
- 415 30. Ferrières L et al. (2010) Silent mischief: Bacteriophage Mu insertions contaminate  
416 products of *Escherichia coli* random mutagenesis performed using suicidal transposon  
417 delivery plasmids mobilized by broad-host-range RP4 conjugative machinery. *J Bacteriol*  
418 192:6418–6427.
- 419 31. Jiang Y et al. (2017) CRISPR-Cpf1 assisted genome editing of *Corynebacterium*  
420 *glutamicum*. *Nat Commun* 8:15179.
- 421 32. Shetty RP, Endy D, Knight TF (2008) Engineering BioBrick vectors from BioBrick parts.  
422 *J Biol Eng* 2:5.
- 423 33. Kremers GJ, Goedhart J, Van Munster EB, Gadella TWJ (2006) Cyan and yellow super  
424 fluorescent proteins with improved brightness, protein folding, and FRET Förster radius.  
425 *Biochemistry* 45:6570–6580.
- 426 34. Foster TJ, Davis MA, Roberts DE, Takeshita K, Kleckner N (1981) Genetic organization  
427 of transposon Tn10. *Cell* 23:201–13.
- 428 35. Bender J, Kleckner N (1992) Tn10 insertion specificity is strongly dependent upon  
429 sequences immediately adjacent to the target-site consensus sequence. *Proc Natl Acad Sci*  
430 *U S A* 89:7996–8000.
- 431 36. Lee H, Doak TG, Popodi E, Foster PL, Tang H (2016) Insertion sequence-caused large-  
432 scale rearrangements in the genome of *Escherichia coli*. *Nucleic Acids Res* 44:7109–19.
- 433 37. Young DM, Parke D, Ornston LN (2005) Opportunities for genetic investigation afforded  
434 by *Acinetobacter baylyi*, a nutritionally versatile bacterial species that is highly competent  
435 for natural transformation. *Annu Rev Microbiol* 59:519–551.
- 436 38. Elliott KT, Neidle EL (2011) *Acinetobacter baylyi* ADP1: transforming the choice of

- 437 model organism. *IUBMB Life* 63:1075–1080.
- 438 39. Metzgar D et al. (2004) *Acinetobacter* sp. ADP1: an ideal model organism for genetic  
439 analysis and genome engineering. *Nucleic Acids Res* 32:5780–5790.
- 440 40. Williams KP et al. (2010) Phylogeny of gammaproteobacteria. *J Bacteriol* 192:2305–14.
- 441 41. Hunger M, Schmucker R, Kishan V, Hillen W (1990) Analysis and nucleotide sequence  
442 of an origin of an origin of DNA replication in *Acinetobacter calcoaceticus* and its use for  
443 *Escherichia coli* shuttle plasmids. *Gene* 87:45–51.
- 444 42. Gralton EM, Campbell AL, Neidle EL (1997) Directed introduction of DNA cleavage  
445 sites to produce a high-resolution genetic and physical map of the *Acinetobacter* sp. strain  
446 ADP1 (BD413UE) chromosome. *Microbiology* 143:1345–1357.
- 447 43. Tucker AT et al. (2014) Defining gene-phenotype relationships in *Acinetobacter*  
448 *baumannii* through one-step chromosomal gene inactivation. *MBio* 5:e01313-14.
- 449 44. Touchon M et al. (2014) The genomic diversification of the whole *Acinetobacter* genus:  
450 origins, mechanisms, and consequences. *Genome Biol Evol* 6:2866–2882.
- 451 45. de Berardinis V et al. (2008) A complete collection of single-gene deletion mutants of  
452 *Acinetobacter baylyi* ADP1. *Mol Syst Biol* 4:174.
- 453 46. Murin CD, Segal K, Bryksin A, Matsumura I (2012) Expression vectors for  
454 *Acinetobacter baylyi* ADP1. *Appl Environ Microbiol* 78:280–283.
- 455 47. Gerischer U, D’Argenio DA, Ornston LN (1996) IS1236, a newly discovered member of  
456 the IS3 family, exhibits varied patterns of insertion into the *Acinetobacter calcoaceticus*  
457 chromosome. *Microbiology* 142:1825–1831.
- 458 48. Renda BA, Dasgupta A, Leon D, Barrick JE (2015) Genome instability mediates the loss  
459 of key traits by *Acinetobacter baylyi* ADP1 during laboratory evolution. *J Bacteriol*

- 460 197:872–881.
- 461 49. Suárez GA, Renda BA, Dasgupta A, Barrick JE (2017) Reduced mutation rate and  
462 increased transformability of transposon-free *Acinetobacter baylyi* ADP1-ISx. *Appl*  
463 *Environ Microbiol* 83:e01025-17.
- 464 50. Martínez-García E, Nickel PI, Aparicio T, de Lorenzo V (2014) *Pseudomonas* 2.0: genetic  
465 upgrading of *P. putida* KT2440 as an enhanced host for heterologous gene expression.  
466 *Microb Cell Fact* 13:159.
- 467 51. Choi JW, Yim SS, Kim MJ, Jeong KJ (2015) Enhanced production of recombinant  
468 proteins with *Corynebacterium glutamicum* by deletion of insertion sequences (IS  
469 elements). *Microb Cell Fact* 14:207.
- 470 52. Lajoie MJ et al. (2013) Genomically recoded organisms expand biological functions.  
471 *Science* 342:357–360.
- 472 53. Burgard A, Burk MJ, Osterhout R, Van Dien S, Yim H (2016) Development of a  
473 commercial scale process for production of 1,4-butanediol from sugar. *Curr Opin*  
474 *Biotechnol* 42:118–125.
- 475 54. Winkler JD et al. (2016) The resistome: a comprehensive database of *Escherichia coli*  
476 resistance phenotypes. *ACS Synth Biol* 5:1566–1577.
- 477 55. Garst AD et al. (2017) Genome-wide mapping of mutations at single-nucleotide  
478 resolution for protein, metabolic and genome engineering. *Nat Biotechnol* 35:48–55.
- 479 56. Yang L et al. (2015) Genome-wide inactivation of porcine endogenous retroviruses  
480 (PERVs). *Science* 350:1101–1104.
- 481 57. Pitcher RS, Brissett NC, Doherty AJ (2007) Nonhomologous end-joining in bacteria: a  
482 microbial perspective. *Annu Rev Microbiol* 61:259–282.

- 483 58. Chayot R, Montagne B, Mazel D, Ricchetti M (2010) An end-joining repair mechanism  
484 in *Escherichia coli*. *Proc Natl Acad Sci* 107:2141–2146.
- 485 59. Su T et al. (2016) A CRISPR-Cas9 assisted non-homologous end-joining strategy for  
486 one-step engineering of bacterial genome. *Sci Rep* 6:37895.
- 487 60. Umenhoffer K et al. (2017) Genome-wide abolishment of mobile genetic elements using  
488 genome shuffling and CRISPR/Cas-assisted MAGE allows the efficient stabilization of a  
489 bacterial chassis. *ACS Synth Biol* 6:1471–1483.
- 490 61. Peters JM et al. (2018) Mobile-CRISPRi: Enabling genetic analysis of diverse bacteria.  
491 *bioRxiv*. Available at: <http://dx.doi.org/10.1101/315499>.
- 492 62. Lee ME, DeLoache WC, Cervantes B, Dueber JE (2015) A highly characterized yeast  
493 toolkit for modular, multipart assembly. *ACS Synth Biol* 4:975–986.
- 494 63. Miyazaki K (2011) MEGAWHOP cloning: A method of creating random mutagenesis  
495 libraries via megaprimer PCR of whole plasmids. *Methods Enzymol* 498:399–406.
- 496 64. Park J, Bae S, Kim J (2015) Cas-Designer: a web-based tool for choice of CRISPR-Cas9  
497 target sites. *Bioinformatics* 31:4014–6.
- 498 65. Datsenko KA, Wanner BL (2000) One-step inactivation of chromosomal genes in  
499 *Escherichia coli* K-12 using PCR products. *Proc Natl Acad Sci USA* 97:6640–6645.
- 500 66. Doublet B et al. (2008) Antibiotic marker modifications of  $\lambda$ ; Red and FLP helper  
501 plasmids, pKD46 and pCP20, for inactivation of chromosomal genes using PCR products  
502 in multidrug-resistant strains. *J Microbiol Methods* 75:359–361.
- 503 67. Renda BA, Chan C, Parent KN, Barrick JE (2016) Emergence of a competence-reducing  
504 filamentous phage from the genome of *Acinetobacter baylyi* ADP1. *J Bacteriol* 198:3209–  
505 3219.

- 506 68. Zheng Q (2017) rSalvador: An R package for the fluctuation experiment. *G3 (Bethesda)*  
507 7:3849–3856.
- 508 69. Cox RS et al. (2018) Synthetic Biology Open Language Visual (SBOL Visual) Version  
509 2.0. *J Integr Bioinform* 15:20170074.
- 510



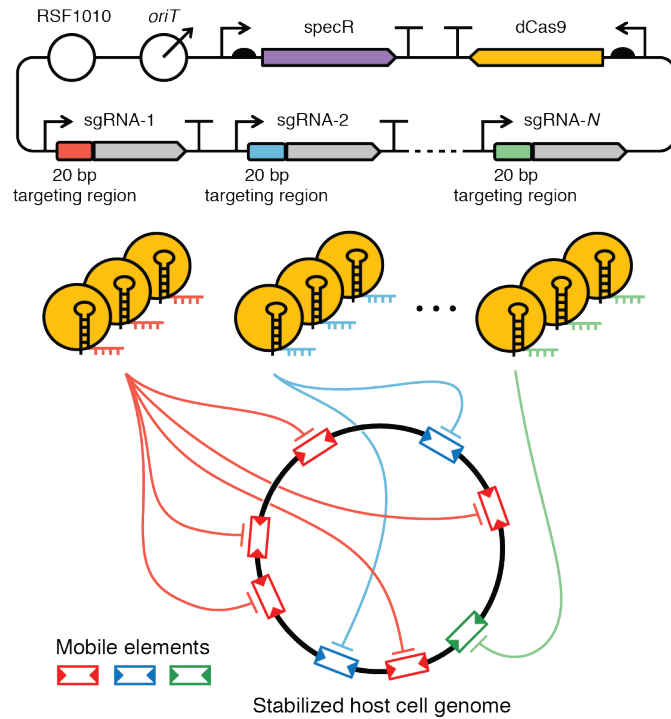

511

512 **Figure 1. CRISPRi-ME stabilization of a genome against mobile element instability.** In the  
513 CRISPR interference with mobile elements (CRISPRi-ME) system, one expresses the catalytically  
514 inactive dCas9 protein and one or more small guide RNAs (sgRNAs) targeting it to repress genes  
515 (e.g., transposases) required for the mobilization of different selfish element families in a host cell.  
516 Repressing the activity of mobile DNA elements prevents mutations that commonly inactivate  
517 genes required for an engineered function. The pictured configuration uses a broad-host-range  
518 plasmid based on the RSF1010 replicon that functions in diverse bacterial species. Plasmid maps  
519 in this and other figures are represented using SBOL visual glyphs (69).

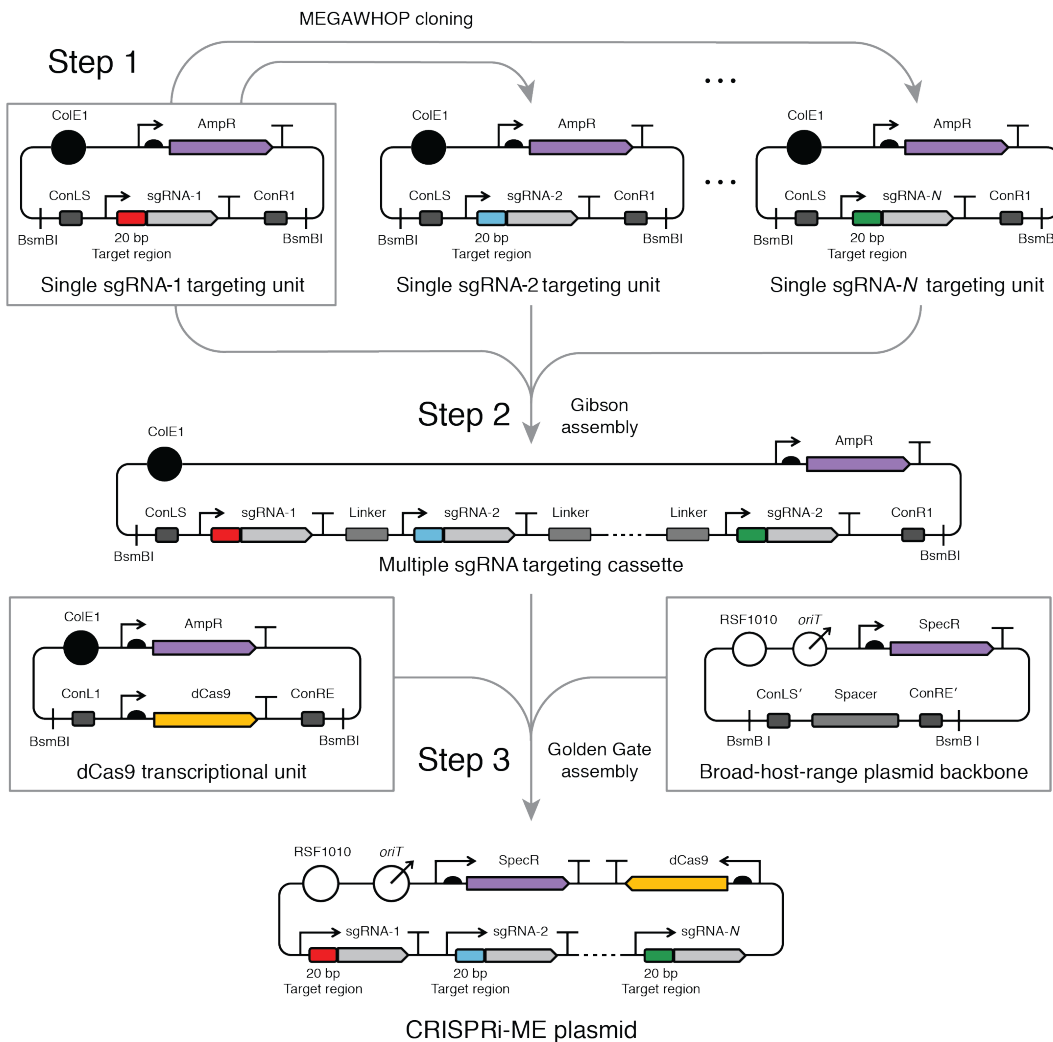

520

521 **Figure 2. Construction of CRISPRi-ME transcriptional units and plasmids.** To create a  
 522 broad-host-range CRISPRi-ME plasmid, one first constructs a series of plasmids containing  
 523 individual sgRNA transcriptional units targeted to different mobile elements by changing the 20-  
 524 base-pair target region of a template plasmid by a method such as MEGAWHOP cloning (**Step 1**).  
 525 Next, the sgRNA transcriptional units from each of these plasmids are composed into a multiple  
 526 sgRNA targeting cassette by a sequence-independent cloning method such as Gibson assembly  
 527 through the addition of unique linker sequences between sgRNA units (**Step 2**). Finally, the dCas9  
 528 transcriptional unit and the multiple sgRNA targeting cassette are assembled onto the broad-host-  
 529 range (RSF1010) plasmid backbone by BsmBI Golden Gate Assembly (**Step 3**). The three boxed  
 530 plasmids are provided as genetic parts for implementing a custom CRISPRi-ME system. Multiple  
 531 versions of the single sgRNA targeting unit and dCas9 transcriptional unit plasmids, with different  
 532 promoters driving sgRNA and dCas9 expression, were created and tested to achieve optimal  
 533 function in two different bacterial species in this study.

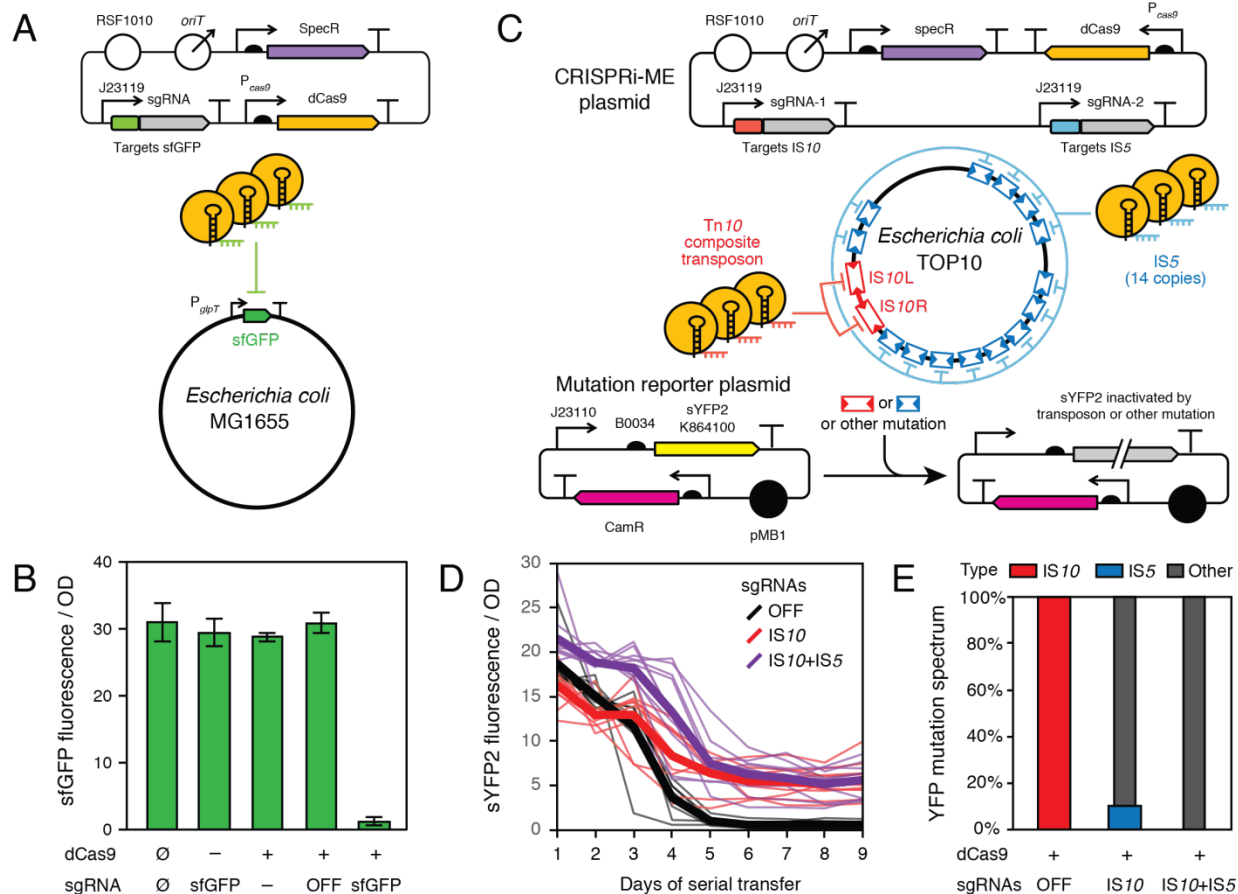

534

535 **Figure 3. CRISPRi-ME prevents evolutionary failure of a burdensome plasmid in *E. coli*.**

536 (A) Design of experiment testing CRISPRi-mediated silencing of a genomically encoded sfGFP  
 537 reporter gene in *E. coli* MG1655 from a broad-host-range plasmid with an RSF1010 origin. (B)  
 538 Expression of sfGFP is repressed by this CRISPRi configuration when the sgRNA is targeted to  
 539 this gene versus in cells with no plasmid (∅) and in control experiments with plasmids missing  
 540 either dCas9 or the sgRNA or with dCas9 and an off-target sgRNA (OFF). Wild-type *E. coli*  
 541 exhibits no fluorescence. Error bars are standard deviations from nine biological replicates. (C)  
 542 Design of experiment targeting CRISPRi-ME against multicopy IS10 and IS5 transposons in the  
 543 *E. coli* TOP10 genome to extend the evolutionary lifetime of burdensome sYFP2 expression from  
 544 a high-copy plasmid. (D) sYFP2 fluorescence was monitored over multiple days of serial transfer  
 545 and regrowth in ten independent cell populations with each CRISPRi-ME plasmid (thin lines). The  
 546 mean for each treatment at each time point is also shown (thick lines). The CRISPRi-ME plasmids  
 547 tested contained an off-target sgrRNA (OFF), an sgrRNA targeting IS10, or two sgrRNAs targeting  
 548 IS10 and IS5. (E) Types of mutations that led to a loss of sYFP2 fluorescence in cells containing  
 549 each CRISPRi-ME plasmid. One evolved sYFP2 plasmid per population was isolated and analyzed  
 550 at the conclusion of the experiment shown in D.

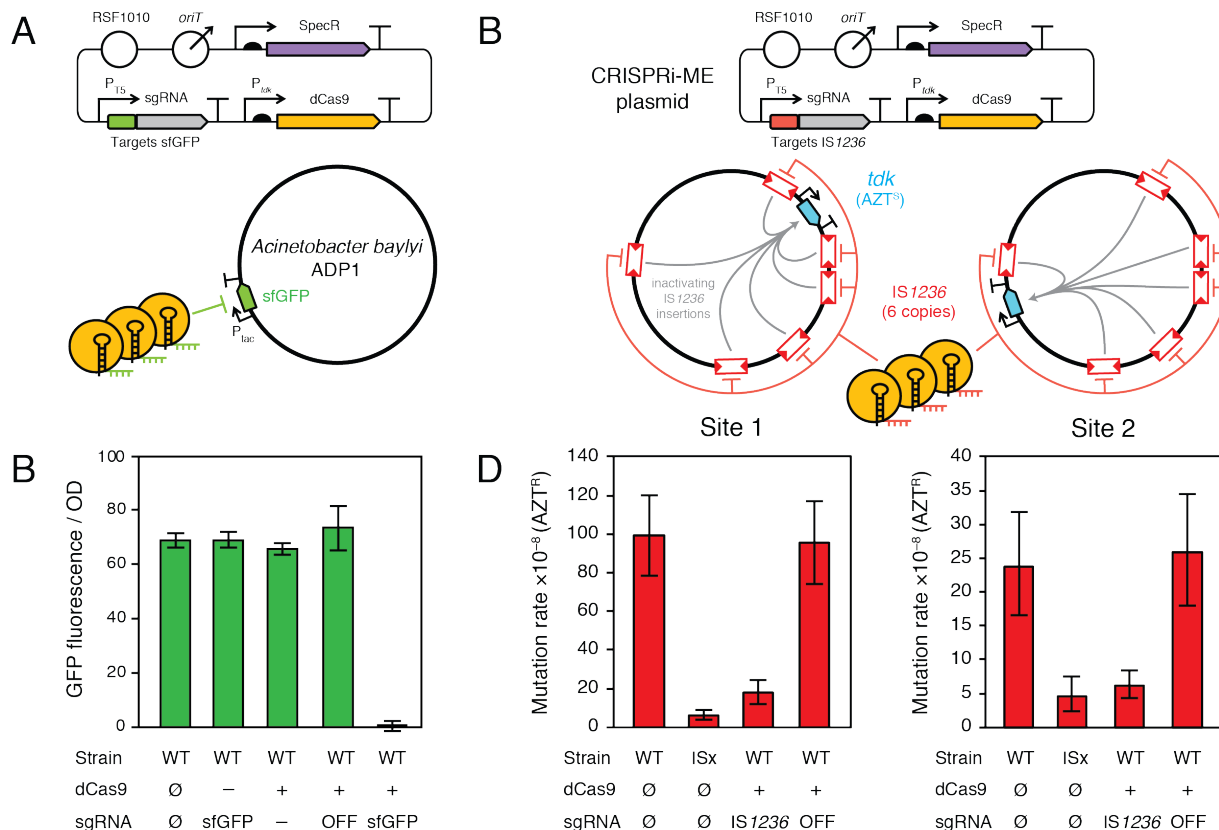

551  
552

553 **Figure 4. CRISPRi-ME reduces the rates of inactivating mutations in *A. baylyi*.** (A) Design  
 554 of experiment testing CRISPRi-mediated silencing of genomically encoded sfGFP in *A. baylyi*  
 555 ADP1 from a broad-host-range plasmid with an RSF1010 origin. (B) Expression of sfGFP is  
 556 repressed by this CRISPRi configuration when the sgRNA is targeted to this gene versus in cells  
 557 with no plasmid (∅) and in control experiments with plasmids missing either dCas9 or the sgRNA  
 558 or with dCas9 and an off-target sgRNA (OFF). Error bars are standard deviations from nine  
 559 biological replicates. (C) Design of experiment using CRISPRi-ME to silence IS1236 in *A. baylyi*  
 560 ADP1. A counter-selectable *tdk* mutational reporter gene was integrated into the ADP1  
 561 chromosome at different sites in two strains. Expression of the *tdk* gene results in toxic  
 562 incorporation of AZT during DNA replication. If an inactivating mutation occurs in *tdk*, it enables  
 563 cells to grow on selective agar containing AZT. (D) Mutation rates to AZT resistance in strains  
 564 containing anti-IS1236 and off-target CRISPRi-ME plasmids estimated from Luria-Delbrück  
 565 fluctuation tests. ISx is a variant of wild-type *A. baylyi* ADP1 (WT) with all five IS1236 elements  
 566 deleted from its chromosome. Error bars are 95% confidence intervals.

567 **Dataset S1. Sequences of plasmids used to assemble CRISPRi-ME systems and sgRNA target**  
568 **sites in GenBank Flat File Format**
